# Supplementary material
Source: publisher site journal article supplement (https://www.spandidos-publications.com/1145/downloadSupplementary)

Figure S1. Hematoxylin and eosin staining of the diffuse growth of xenografts and the corresponding original tumors. Similar to the corresponding original tumors, 6 cases of diffuse growth xenografts did not exhibit a clear boundary with the normal brain tissue. Boundaries of the original tumors were only observed in the surgical specimens of cases 1 and 4.

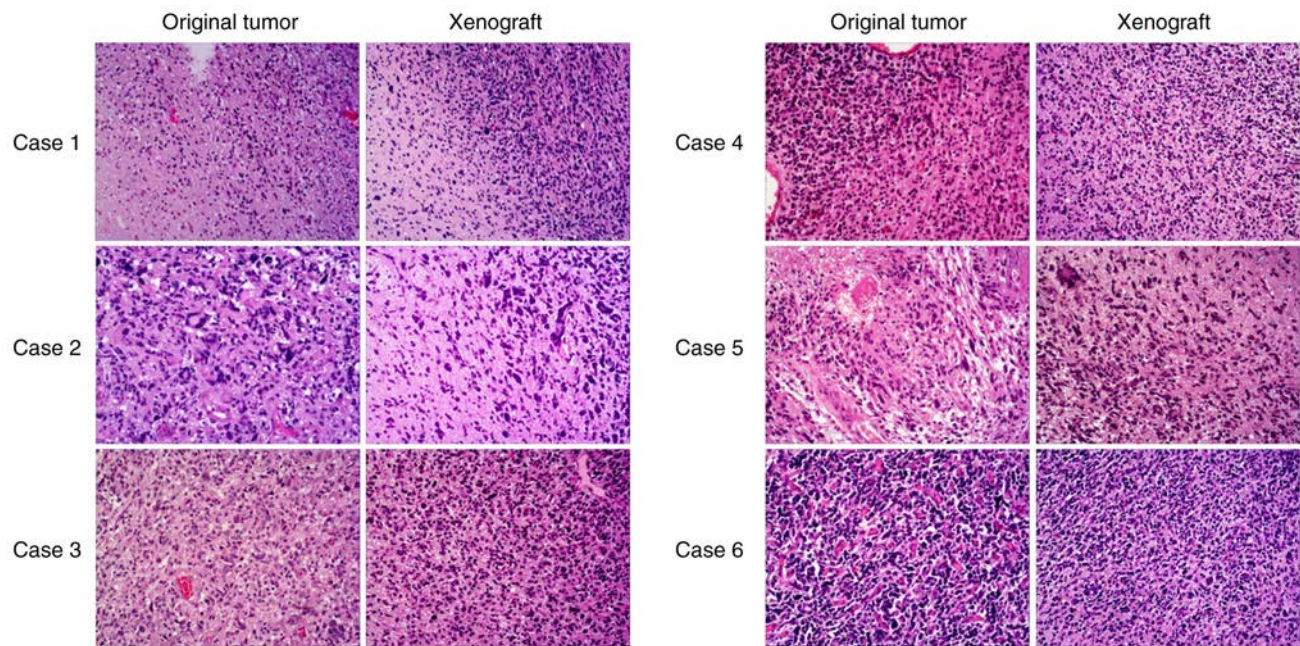

Supplement: Supplementary file 1 [file downloadSupplementary]
